# Supplementary material
Source: publisher site journal article supplement (https://www.dovepress.com/get_supplementary_file.php?f=364108.docx)
Supplement: Supplementary file 1 [file get_supplementary_file.php]

**Supporting information**

Construction highly loading natural active substances nanoplatform and application in synergistic tumor therapy

**Contents:**

Section 1. Design and Synthesis of HMPB NPs

Section 2. Photothermal Performance of HMPB NPs

Section 3. Loading and Release Behavior of PC B2 in HMPB NPs

Section 4. *In Vitro* Synergistic Therapeutic Efficacy

Section 5. *In Vivo* Synergistic Therapeutic Efficacy

**Section 1** **Design and Synthesis of HMPB NPs**

**Figure. S1.** XRD spectra of MPB NPs and HMPB NPs.


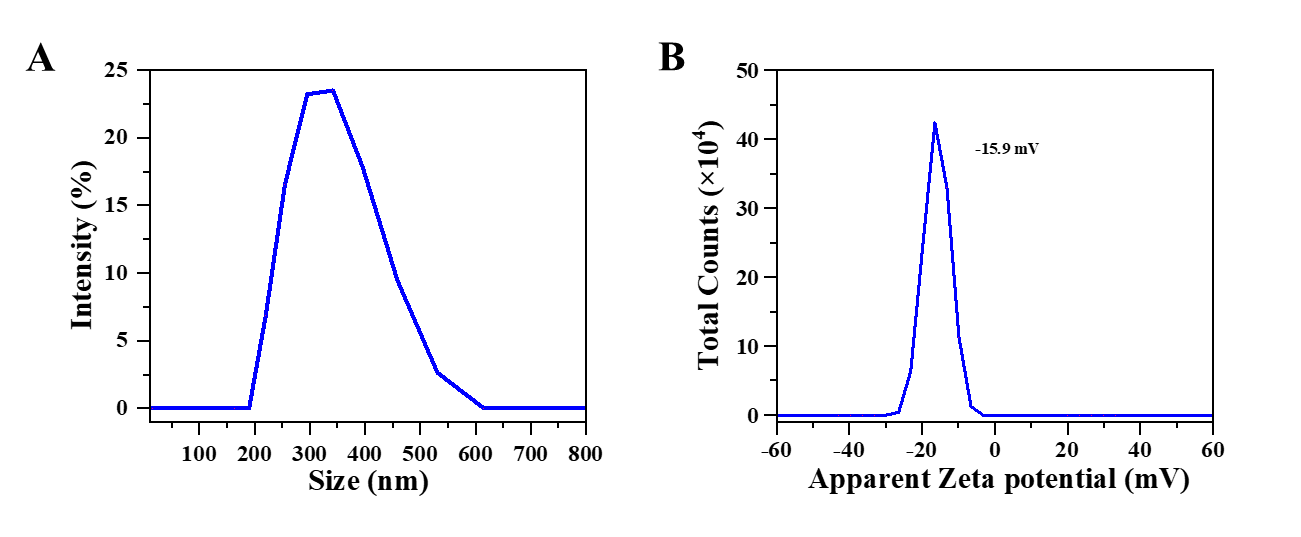


**Figure. S2.** A) Size distribution of HMPB NPs measured by DLS. B) Zeta potentials of HMPB NPs.

**Section 2 Photothermal Performance of HMPB NPs**


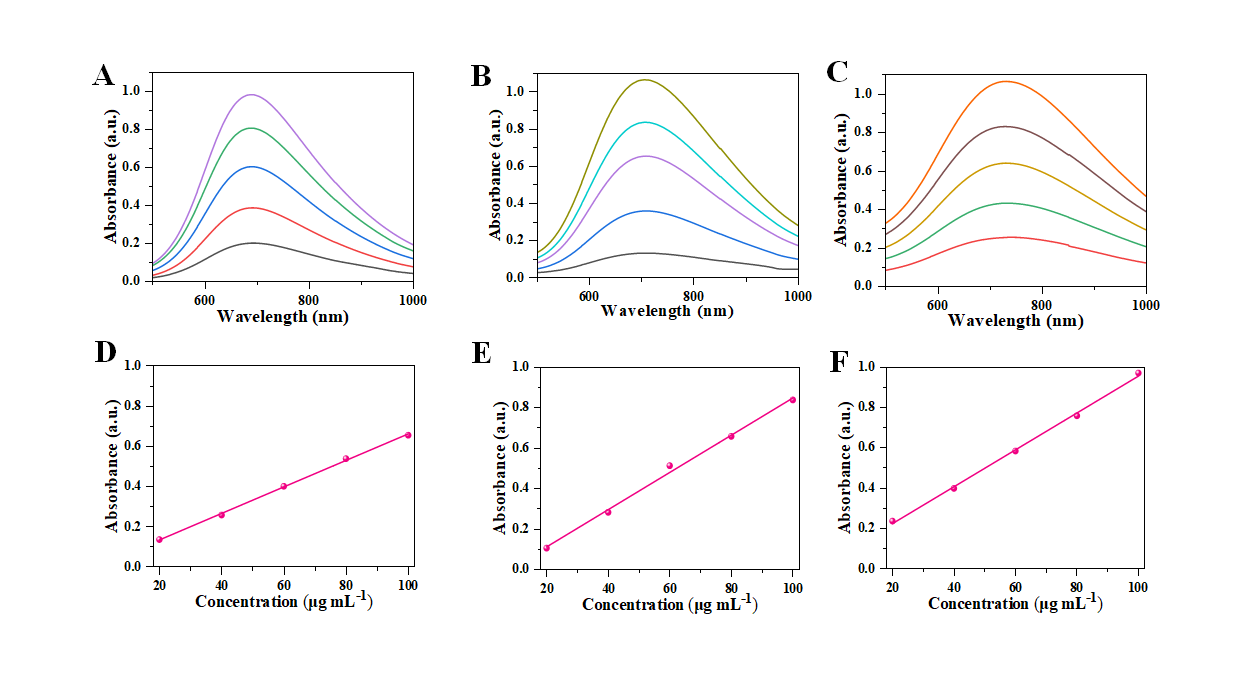


**Figure. S3.** A), B), and C) UV-visible absorption spectroscopy of PB NPs, MPB NPs, and HMPB NPs at different concentrations (20, 40, 60, 80, 100μg mL-1). D), E), and F) The mass extinction coefficient of PB NPs, MPB NPs and HMPB NPs at 808 nm.


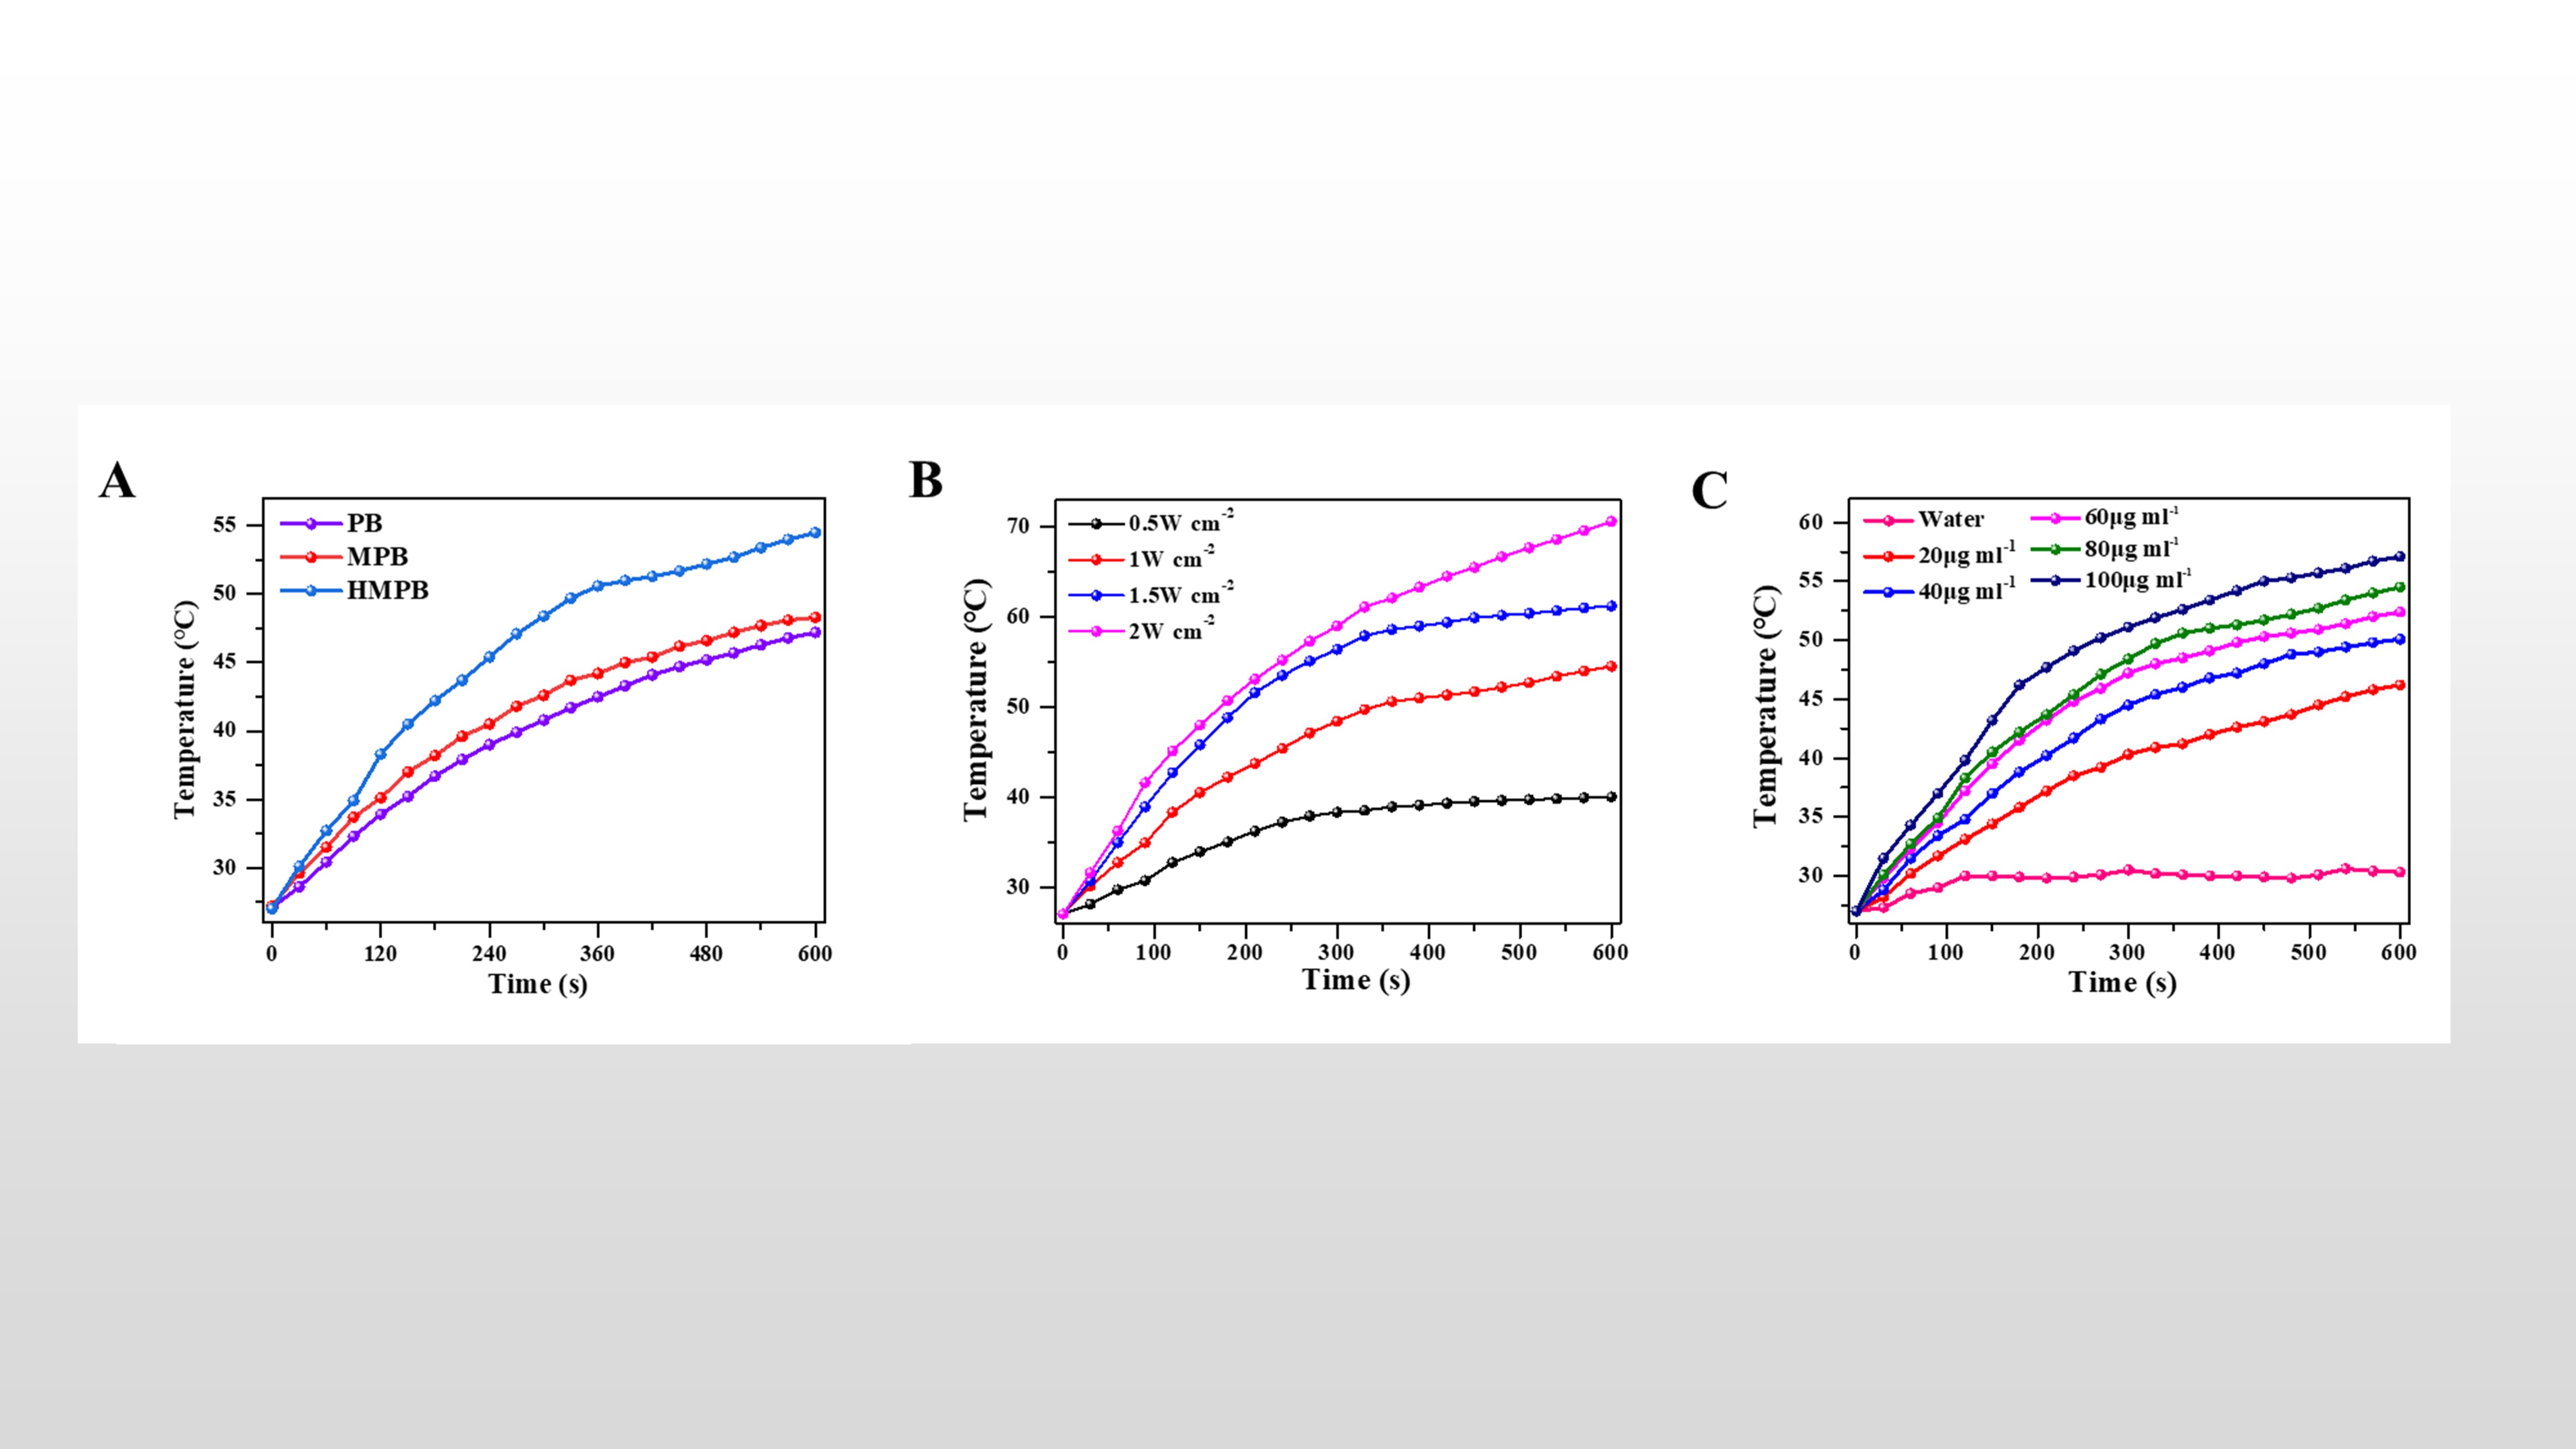


**Figure. S4.** A) Temperature-rise curves of PB NPs (purple), MPB NPs (red), and HMPB NPs (blue) within 10 min under irradiation of 808 nm NIR laser (1W cm-2). B) Temperature change curves of various power densities (0.5, 1, 1.5, 2 W cm-2) of HMPB NPs within 10 min under irradiation of 808 nm laser. C) Temperature change curves of solutions containing different concentrations of HMPB (20, 40, 60, 80, 100μg mL-1) within 10 min under irradiation of 808 nm laser.


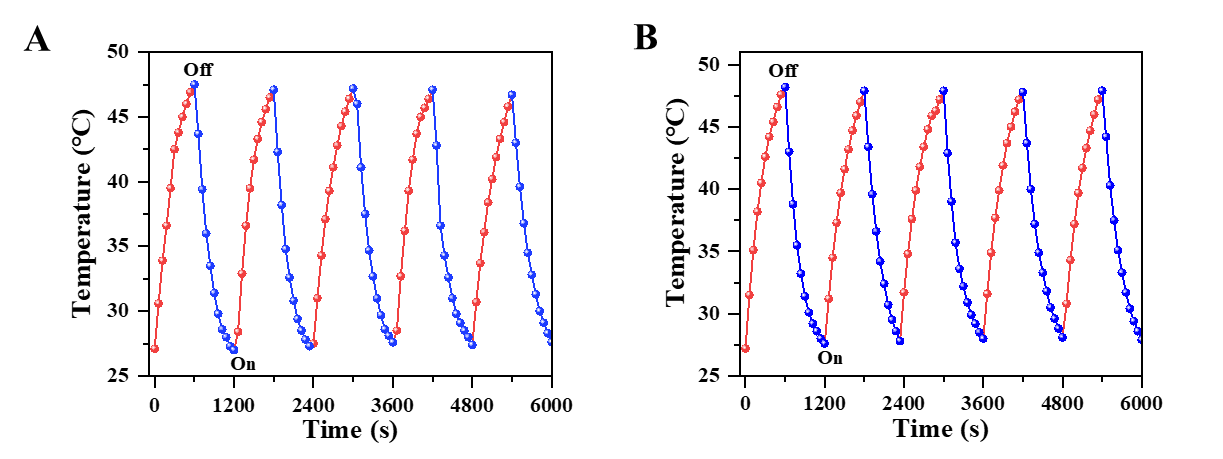


**Figure. S5.** A) and B) Recycling heating curves of the solution containing PB NPs and MPB NPs for 5 on/off cycles of the 808 nm laser irradiation (1 W cm -2).


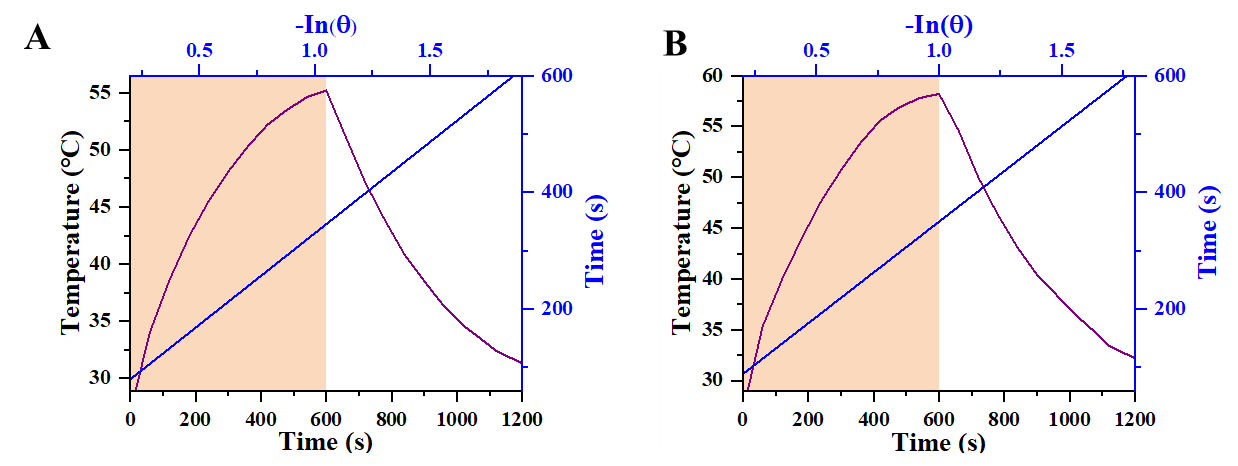


**Figure. S6.** A) and B) Calculated photothermal-conversion efficiency of PB NPs and MPB NPs at 808 nm (1.5W cm-2). Purple line: temperature change curves of the solution under 808 nm laser irradiation for 10 min, and then the laser was turned off. Blueline: time constant (τs) for the heat transfer from the system obtained by applying the linear time data from the cooling period (A:R2=0.99944, B: R2=0.9994).

**Section 3** **Loading and Release Behavior of PC B2 in HMPB NPs**

**Figure. S7**. The corresponding pore size distribution of HMPB.


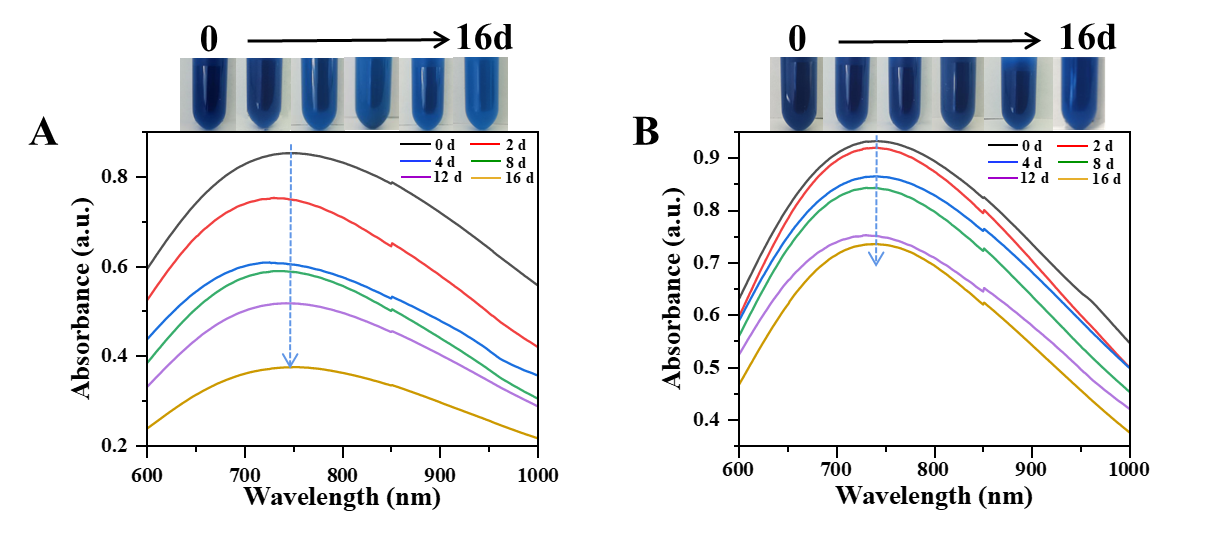


**Figure. S8.** Estimation of HMPB NPs biodegradability. A) and B) UV-visible absorption spectra of HMPB in the range of 600–1000 nm after immersing in PBS of different pH (5.0, 7.2).


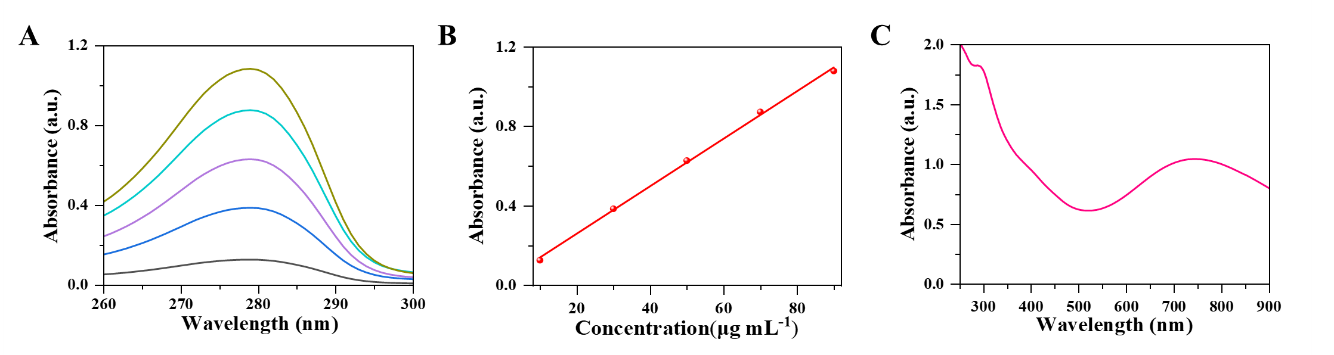


**Figure. S9.** A) and B) UV-Visible absorption spectra of PC B2 at different concentrations and standard curves. C) UV-visible absorption spectra of HMPB-PC B2.


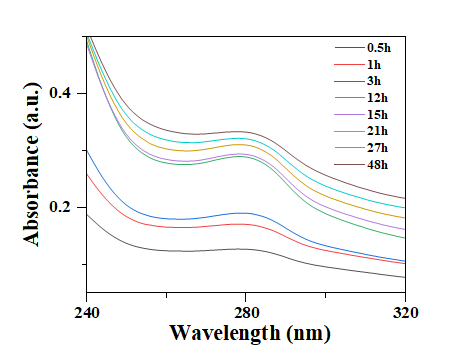


**Figure. S10.** UV-visible absorption spectra of PC B2 released in vitro from HMPB-PC B2 at pH 5.0.

**Section 4*****In Vitro* Synergistic Therapeutic Efficacy**


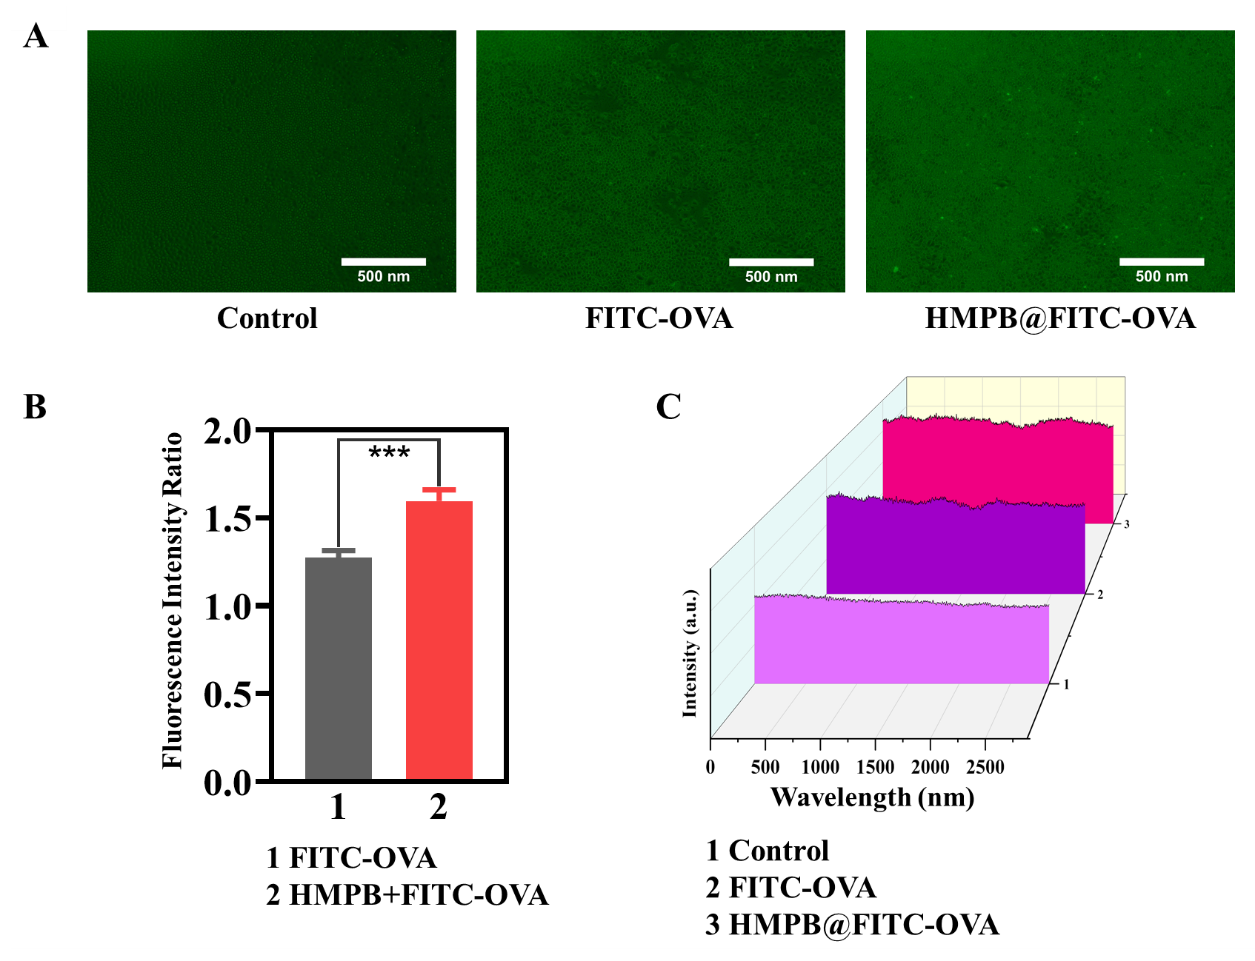


**Figure. S11.** A) Fluorescence Microscope images of HeLa cells after co-incubated with FITC-labeled HMPB NPs (100 µg mL-1) for 12 h. B) Fluorescence quantitative analysis of the FITC/Control fluorescence intensity ratio in the two treatment groups. C) Waterfall plot of the relative FITC fluorescence intensity in different groups (***p < 0.005).


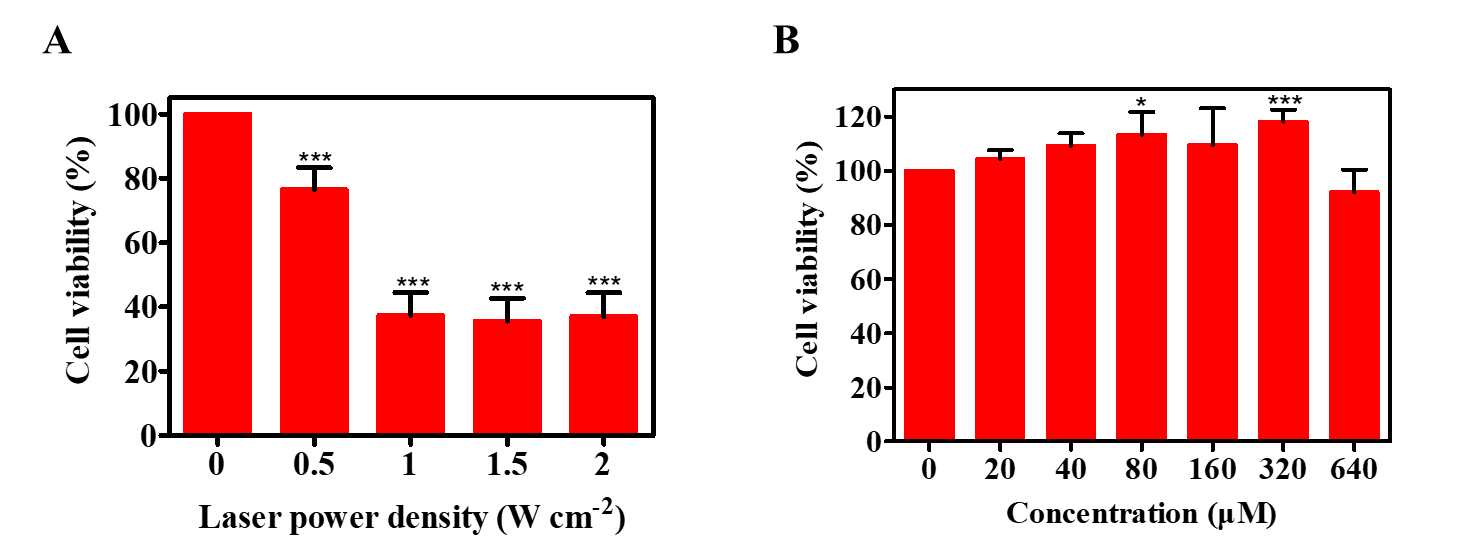


**Figure. S12.** A) Relative cell viabilities of Hela cells under at the various power densities (0.5, 1, 1.5, 2 W cm-2) with HMPB NPs (100 μg mL-1). B) Relative cell viabilities of 293T cells after being under different concentration of PC B2 (*p < 0.05 and ***p < 0.005).

**Section 5** ***In Vivo* Synergistic Therapeutic Efficacy**


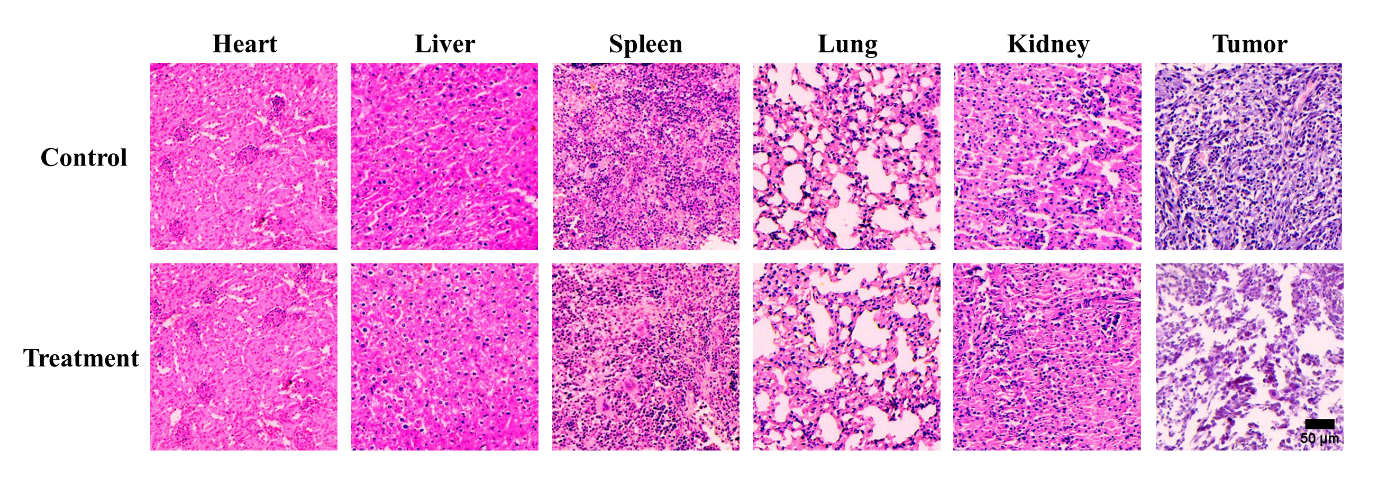


**Figure. S13.** HE-stained images of main organs and tumors of tumor-bearing mice with various treatment.

**Figure. S14.** ALT and AST index of the control and treatment groups.


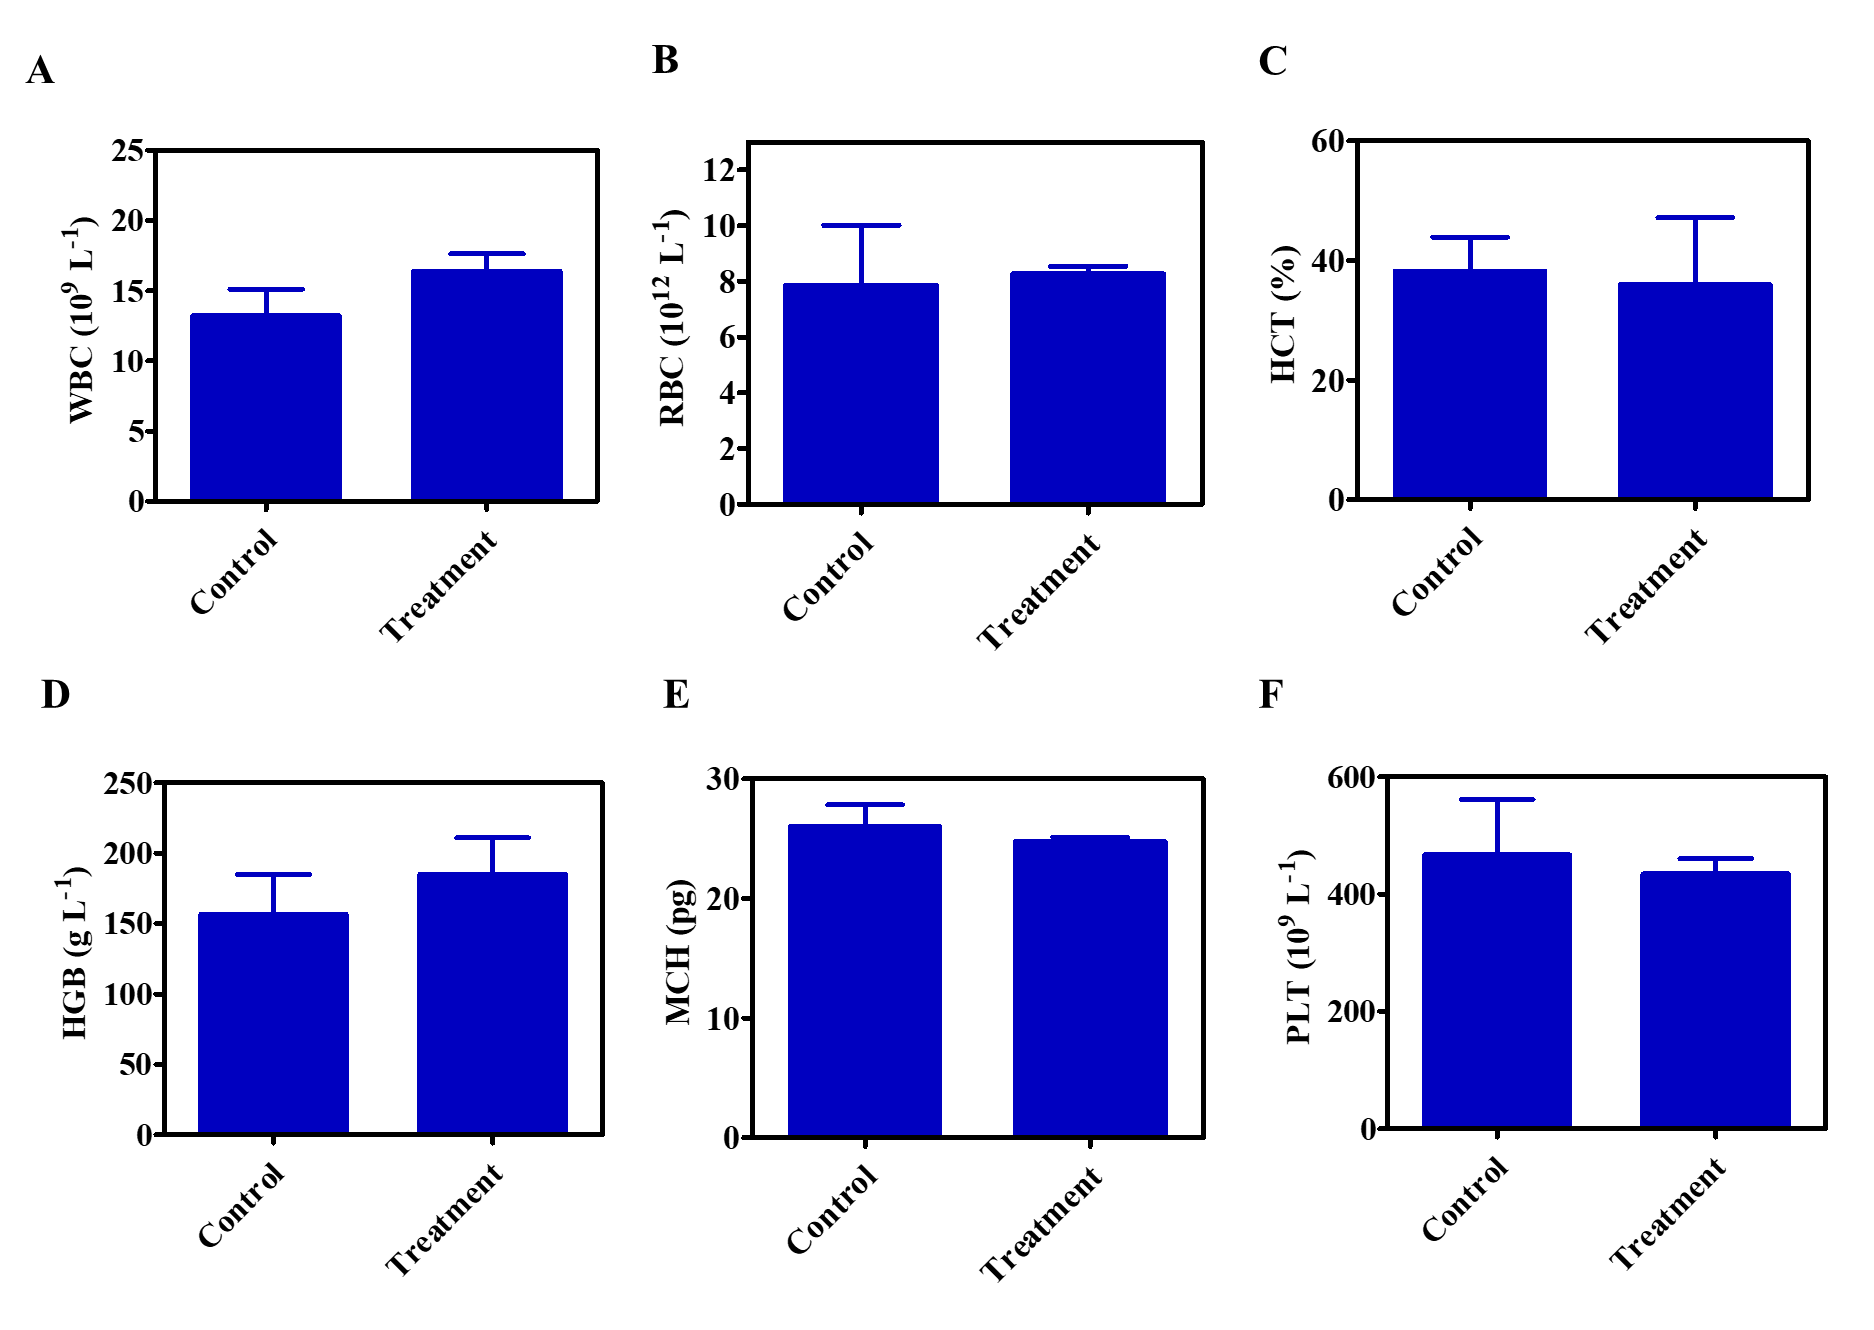


**Figure. S15.** In vivo biocompatibility evaluation of HMPB@PC B2 nanoplatform. A-F). The haematological data of Hela-bearing balb/c nude mice after 14 days of varied treatments.
